# Supplementary material
Source: PubMed Central journal article supplement (PMC4902875)
Supplement: NIHMS786313-supplement-supll.pdf [file NIHMS786313-supplement-supll.pdf]

## Supporting Information

David R. Jackson <sup>1</sup>, Xia Yu <sup>2</sup>, Guojung Wang <sup>2</sup>, Avinash Patel <sup>1</sup>, Jordi Calveras <sup>4</sup>, Jesus Barajas, Eita Sasaki <sup>4</sup>, Mikko Metsä-Ketelä <sup>3</sup>, Hung-wen Liu <sup>4</sup>, Jürgen Rohr <sup>\*2</sup>, and Shiou-Chuan Tsai <sup>\*1</sup>

1. Department of Molecular Biology and Biochemistry, Department of Chemistry, and Department of Pharmaceutical Sciences, University of California, Irvine, CA 92697. 2. Department of Pharmaceutical Sciences, College of Pharmacy, University of Kentucky, Lexington, KY 40536. 3. Department of Biochemistry, University of Turku, 20014 Turku, Finland. 4. Division of Medicinal Chemistry, College of Pharmacy and Department of Chemistry, University of Texas at Austin, Austin, TX 78712.

**Corresponding authors:** Shiou-Chuan Tsai. Department of Molecular Biology and Biochemistry, Department of Chemistry, and Department of Pharmaceutical Sciences, University of California, Irvine. 949-824-4486. [setsai@uci.edu](mailto:setsai@uci.edu). Jürgen Rohr. Department of Pharmaceutical Sciences, University of Kentucky. 859-323-5031. [jrohr2@email.uky.edu](mailto:jrohr2@email.uky.edu).

| Enzyme | Organism                             | Natural product | Type        | PDB ID | % Identity | RMSD (Å) | Ligand(s)             | FAD |
|--------|--------------------------------------|-----------------|-------------|--------|------------|----------|-----------------------|-----|
| BexE   | <i>Amycolatopsis orientalis</i>      | BE-7585A        | type II PKS | 4X4J   | 100        | 0.00     | FAD                   | in  |
| PgaE   | <i>Streptomyces PGA64</i>            | gaudimycin      | type II PKS | 2AQ1   | 74         | 0.70     | FAD                   | in  |
| PgaE   | <i>Streptomyces PGA64</i>            | gaudimycin      | type II PKS | 4ICY   | 74         | 0.60     | FAD                   | in  |
| CabE   | <i>Streptomyces H201</i>             | unknown         | type II PKS | 2QA2   | 46         | 0.53     | FAD                   | in  |
| MtmOIV | <i>Streptomyces argillaceus</i>      | mithramycin     | type II PKS | 4K5S   | 48         | 1.04     | FAD, premithramycin B | in  |
| MtmOIV | <i>Streptomyces argillaceus</i>      | mithramycin     | type II PKS | 3FMW   | 48         | 1.02     | FAD                   | in  |
| OxyS   | <i>Streptomyces rimosus</i>          | oxytetracycline | type II PKS | 4K2X   | 45         | 0.82     | FAD                   | in  |
| RdmE   | <i>Streptomyces purpurascens</i>     | rhodomycin      | type II PKS | 3IHG   | 31         | 3.10     | FAD, akklavinone      | out |
| RebC   | <i>Lechevalieria aerocolonigenes</i> | rebbecamycin    | alkaloid    | 2R0C   | 28         | 4.35     | FAD                   | out |
| RebC   | <i>Lechevalieria aerocolonigenes</i> | rebbecamycin    | alkaloid    | 4EIP   | 28         | 4.04     | FAD, K252c            | in  |
| RebC   | <i>Lechevalieria aerocolonigenes</i> | rebbecamycin    | alkaloid    | 4EIQ   | 28         | 3.95     | KCT                   | N/A |
| RebC   | <i>Lechevalieria aerocolonigenes</i> | rebbecamycin    | alkaloid    | 2R0G   | 28         | 5.59     | FAD, 7-carboxy-K252c  | in  |
| RebC   | <i>Lechevalieria aerocolonigenes</i> | rebbecamycin    | alkaloid    | 2R0P   | 28         | 3.01     | FAD, K252c soaked     | out |
| RebC   | <i>Lechevalieria aerocolonigenes</i> | rebbecamycin    | alkaloid    | 3EPT   | 28         | 4.37     | FAD (reduced)         | in  |

**Table S1.** A table listing the crystal structures of biosynthetic oxygenases that are related to BexE. The % identity and RMSD are relative to the BexE structure. The last column, “FAD” corresponds to the conformation of FAD.

|                                          | <b>BexE (PDB ID: 4X4J)</b>                             |
|------------------------------------------|--------------------------------------------------------|
| <b>Crystallization</b>                   | 0.1 M MES pH 7.0, 0.2 M ammonium sulfate, 30% PEG 3350 |
| <b>Crystallographic Data</b>             |                                                        |
| Wavelength (Å)                           | 1.0000                                                 |
| Space Group                              | C2                                                     |
| Cell Dimensions (a, b, c) (Å)            | 150.672, 80.379, 105.079                               |
|                                          | $\alpha=\gamma=90^\circ$<br>$\beta=126.191^\circ$      |
| Resolution (Å)                           | 50.00 - 2.65                                           |
| No. of observations                      | 218698                                                 |
| No. of unique observations               | 29488                                                  |
| Completeness %                           | 100.00 (99.8)                                          |
| I/ $\sigma$ (I)                          | 21.6 (3.9)                                             |
| R <sub>merge</sub> %                     | 8.4 (46.9)                                             |
| Redundancy                               | 7.4                                                    |
| <b>Refinement</b>                        |                                                        |
| Resolution (Å)                           | 50.00 - 2.65 (2.74 - 2.65)                             |
| No. of protein atoms                     | 7162                                                   |
| No. of ligand atoms                      | 121                                                    |
| No. of water atoms                       | 58                                                     |
| R <sub>free</sub> %                      | 24.56 (35.29)                                          |
| R <sub>crys</sub> %                      | 19.62 (29.89)                                          |
| <b>Geometry</b>                          |                                                        |
| RMS bonds (Å)                            | 0.005                                                  |
| RMS angles (°)                           | 0.960                                                  |
| Ramachandran Favored (%)                 | 96                                                     |
| Ramachandran Allowed (%)                 | 3.58                                                   |
| Ramachandran Disallowed (%)              | 0.42                                                   |
| <b>Average B-factors (Å<sup>2</sup>)</b> |                                                        |
| Protein                                  | 58.20                                                  |
| Water                                    | 55.80                                                  |
| Ligands                                  | 48.10                                                  |

**Table S2.** BexE crystallographic data collection and refinement statistics.  
\*Numbers in parentheses denote the highest resolution shell.



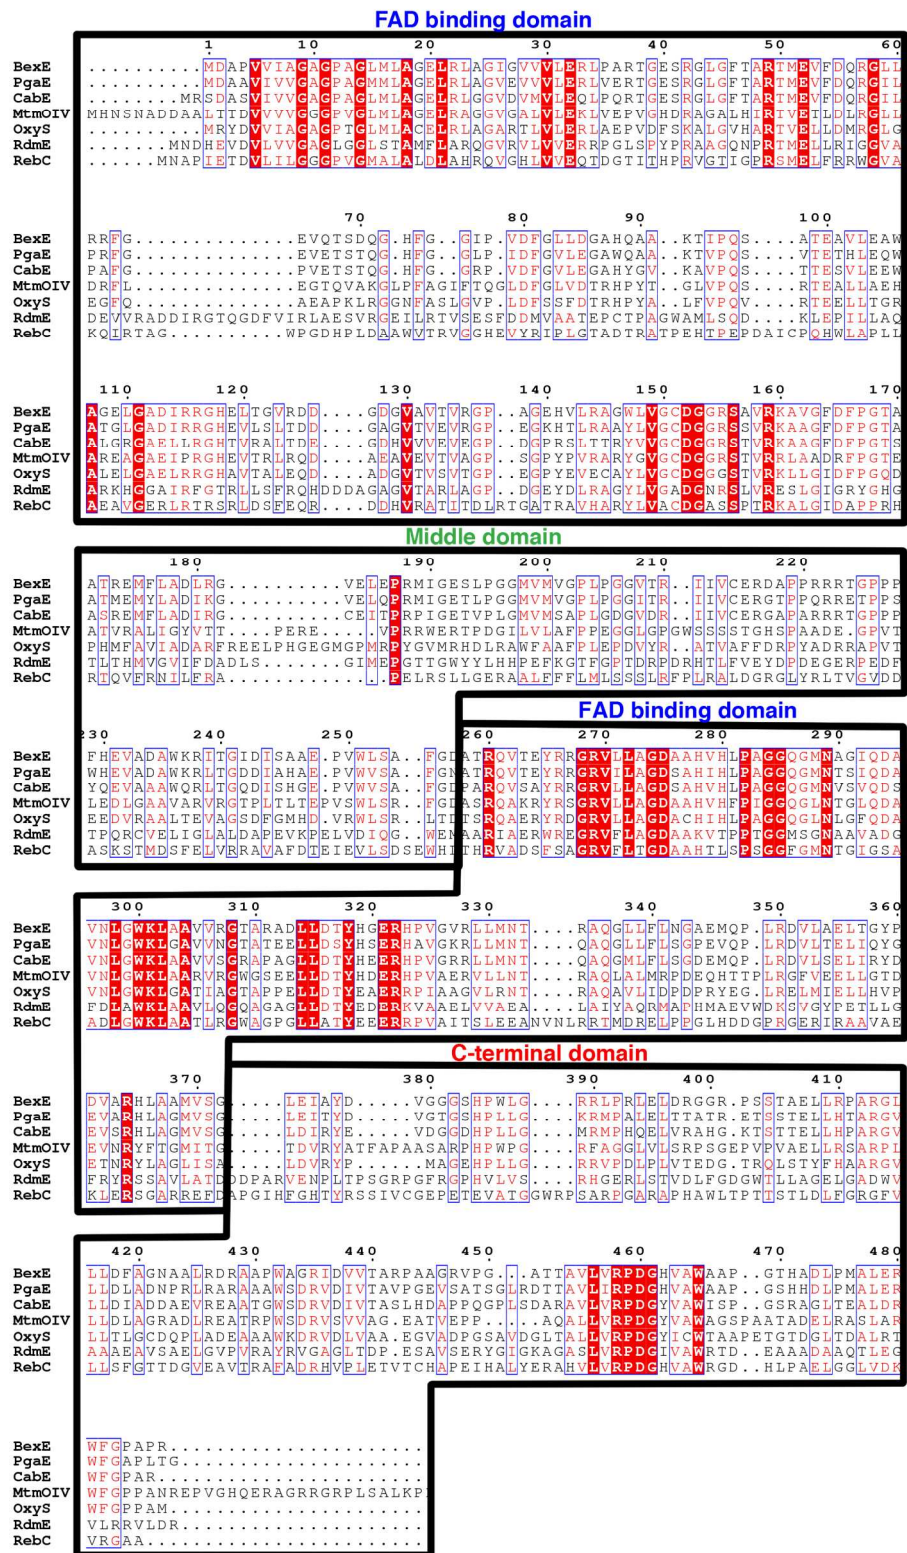

**Figure S2.** Sequence alignment of BexE with other oxygenases from biosynthetic pathways.



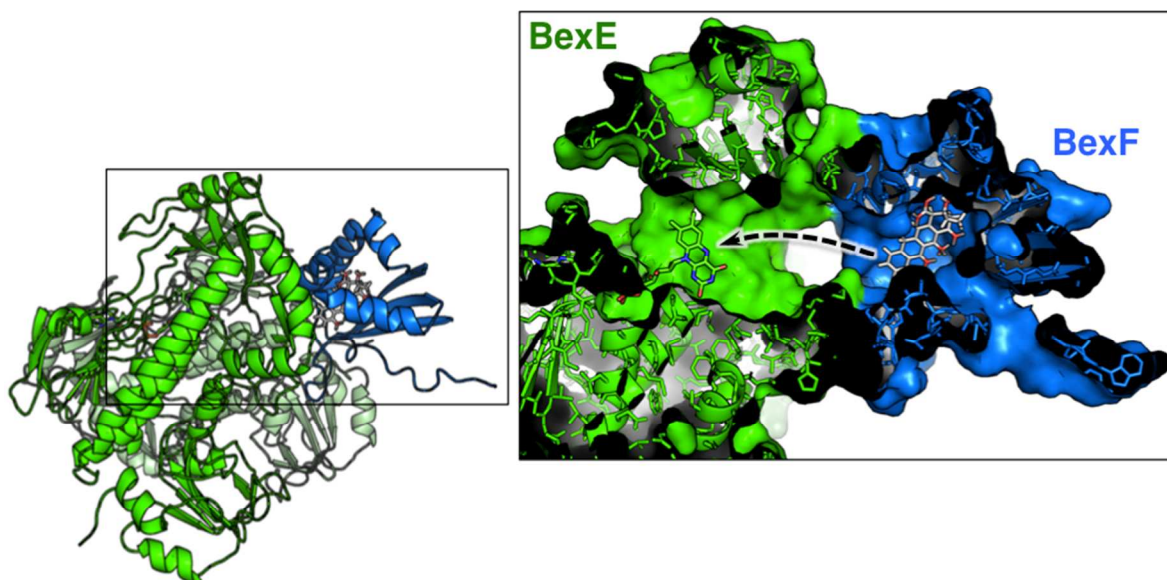

**Figure S3.** A cartoon representation of the BexF homology model bound to a tetracyclic substrate and docked to the surface of BexE. The BexF model contains a large pocket and active site entrance. When BexF is docked with BexE, a clear interface between the two enzyme active site entrances forms to reveal a tunnel, which we hypothesize is responsible for transferring a reactive substrate from the BexF active site to the BexE active site.
